# Supplementary material for: Anthropometry in 5- to 9-Year-Old Greenlandic and Ukrainian Children in Relation to Prenatal Exposure to Perfluorinated Alkyl Substances
Source: PubMed Central journal article supplement (PMC4529015; doi:10.1289/ehp.1408881), 2015-03-26
Supplement: ehp.1408881.s001.acco.pdf [file ehp.1408881.s001.acco.pdf]

**Note to Readers:** *EHP* strives to ensure that all journal content is accessible to all readers.

However, some figures and Supplemental Material published in *EHP* articles may not conform to 508 standards due to the complexity of the information being presented. If you need assistance accessing journal content, please contact [ehp508@niehs.nih.gov](mailto:ehp508@niehs.nih.gov). Our staff will work with you to assess and meet your accessibility needs within 3 working days.

## Supplemental Material

### **Anthropometry in 5- to 9-Year-Old Greenlandic and Ukrainian Children in Relation to Prenatal Exposure to Perfluorinated Alkyl Substances**

Birgit Bjerre Høyer, Cecilia Høst Ramlau-Hansen, Martine Vrijheid, Damaskini Valvi, Henning Sloth Pedersen, Valentyna Zvezdai, Bo A.G. Jönsson, Christian H. Lindh, Jens Peter Bonde, and Gunnar Toft

#### **Table of Contents**

**Table S1.** Characteristics of participants and those lost to follow-up.

**Table S2.** Maternal PFOA and PFOS concentrations during pregnancy and crude relative risk (RR) of offspring overweight (WHO > 85<sup>th</sup> percentile (age and sex standardised)) and waist-to-height-ratio >0.5 at 5 to 9 years.

**Table S3.** Maternal PFOA and PFOS concentrations during pregnancy and crude and adjusted associations with BMI z-scores (sex and age standardised) and WHtR in offspring at 5 to 9 years.

**Table S4.** Complete-case-analysis of maternal PFOA and PFOS concentrations during pregnancy and crude and adjusted relative risk (RR) of offspring overweight (WHO > 85<sup>th</sup> percentile (sex and age standardised)) and waist-height-ratio >0.5 at 5 to 9 years.

**Table S1.** Characteristics of participants and those lost to follow-up.

| <b>Characteristic</b>                                                          | <b>Lost to follow-up<sup>a</sup><br/>Greenland<br/>(n=40)</b> | <b>Participants<sup>b</sup><br/>Greenland<br/>(n=531)</b> | <b>Lost to follow-up<sup>c</sup><br/>Ukraine<br/>(n=119)</b> | <b>Participants<sup>d</sup><br/>Ukraine<br/>(n=491)</b> |
|--------------------------------------------------------------------------------|---------------------------------------------------------------|-----------------------------------------------------------|--------------------------------------------------------------|---------------------------------------------------------|
| <b>PFOA</b> , ng/mL<br>[Median (range)]                                        | 1.7 (0.5—3.3)                                                 | 1.8 (0.5—5.1)                                             | 0.9 (0.3—2.6)                                                | 1.0 (0.2—9.8)                                           |
| <b>PFOS</b> , ng/mL<br>[Median (10 <sup>th</sup> 90 <sup>th</sup> percentile)] | 19.4 (10.9—67.7)                                              | 20.2 (4.1—87.3)                                           | 5.1 (0.8—13.3)                                               | 5.0 (15.0—37.9)                                         |
| <b>Maternal pre-pregnancy BMI</b> , kg/m <sup>2</sup><br>[Mean (SD)]           | 24.2 (4.6)                                                    | 24.5 (4.5)                                                | 21.6 (2.9)                                                   | 21.7 (3.3)                                              |
| <b>Paternal BMI</b> , kg/m <sup>2</sup><br>[Mean (SD)]                         | 25.8 (3.4)                                                    | 26.8 (3.8)                                                | 24.3 (3.2)                                                   | 24.2 (2.9)                                              |

Abbreviations: BMI, body mass index; PFOA, perfluorooctanoate; PFOS, perfluorooctane sulfonate.

<sup>a</sup>In the lost to follow-up group, 27.5% had missing information on paternal BMI. <sup>b</sup>Among the participants, 0.4% had missing information on maternal BMI and 25.0% had missing information on paternal BMI. <sup>c</sup>In the lost to follow-up group, 0.8% had missing PFOA, PFOS and maternal BMI and 4.2% had missing paternal BMI. <sup>d</sup>Among the participants, 1.6% had missing information on maternal BMI and 3.3% had missing information on paternal BMI.

**Table S2.** Maternal PFOA and PFOS concentrations during pregnancy and crude relative risk (RR) of offspring overweight (WHO > 85<sup>th</sup> percentile (age and sex standardised)) and waist-to-height-ratio >0.5 at 5 to 9 years.

| Exposure                 | Level                   | Overweight |                    | WHtR >0.5 |                    |
|--------------------------|-------------------------|------------|--------------------|-----------|--------------------|
|                          |                         | n          | Crude RR (95 % CI) | n         | Crude RR (95 % CI) |
| <b>Greenland</b><br>PFOA | Low                     | 177        | 1.00               | 177       | 1.00               |
|                          | Medium                  | 177        | 1.47 (1.07, 2.02)  | 177       | 1.34 (0.95, 1.89)  |
|                          | High                    | 177        | 1.41 (1.02, 1.94)  | 177       | 1.12 (0.78, 1.59)  |
|                          | Continuous <sup>a</sup> | 531        | 1.31 (0.99, 1.72)  | 531       | 1.21 (0.90, 1.63)  |
| PFOS                     | Low                     | 177        | 1.00               | 177       | 1.00               |
|                          | Medium                  | 177        | 1.04 (0.78, 1.38)  | 177       | 1.12 (0.79, 1.59)  |
|                          | High                    | 177        | 0.89 (0.65, 1.22)  | 177       | 1.19 (0.85, 1.68)  |
|                          | Continuous <sup>a</sup> | 531        | 0.95 (0.72, 1.24)  | 531       | 1.26 (0.94, 1.68)  |
| <b>Ukraine</b><br>PFOA   | Low                     | 164        | 1.00               | 164       | 1.00               |
|                          | Medium                  | 164        | 1.34 (0.90, 2.04)  | 164       | 1.18 (0.54, 2.56)  |
|                          | High                    | 163        | 0.78 (0.48, 1.27)  | 163       | 1.01 (0.45, 2.27)  |
|                          | Continuous <sup>a</sup> | 491        | 1.02 (0.73, 1.42)  | 491       | 1.36 (0.79, 2.32)  |
| PFOS                     | Low                     | 164        | 1.00               | 164       | 1.00               |
|                          | Medium                  | 164        | 0.92 (0.60, 1.40)  | 164       | 1.45 (0.64, 3.31)  |
|                          | High                    | 163        | 0.86 (0.56, 1.34)  | 163       | 1.45 (0.64, 3.31)  |
|                          | Continuous <sup>a</sup> | 491        | 1.07 (0.74, 1.56)  | 491       | 1.70 (0.87, 3.32)  |

Abbreviations: CI, confidence interval; PFOA, perfluorooctanoate; PFOS, perfluorooctane sulfonate; RR, relative risk; WHtR, waist-to-height-ratio.

<sup>a</sup>Continuous PFOA and PFOS are natural logarithm transformed.

Multiple imputation was used to impute missing data.

**Table S3.** Maternal PFOA and PFOS concentrations during pregnancy and crude and adjusted associations with BMI z-scores (sex and age standardised) and WHtR in offspring at 5 to 9 years.

| Exposure | Level     | n                       | BMI z-score<br>Crude $\beta$<br>(95 % CI) | BMI z-score<br>Adjusted <sup>a</sup> $\beta$<br>(95% CI) | n   | WHtR<br>Crude $\beta$<br>(95 % CI) | WHtR<br>Adjusted <sup>b</sup> $\beta$<br>(95 % CI) |
|----------|-----------|-------------------------|-------------------------------------------|----------------------------------------------------------|-----|------------------------------------|----------------------------------------------------|
| PFOA     | Greenland | Low                     | reference                                 | reference                                                | 177 | reference                          | reference                                          |
|          |           | Medium                  | 0.23 (-0.03, 0.49)                        | 0.09 (-0.18, 0.35)                                       | 177 | 0.01 (0.00, 0.02)*                 | 0.01 (0.00, 0.02)                                  |
|          |           | High                    | 0.30 (0.05, 0.56)*                        | 0.19 (-0.09, 0.46)                                       | 177 | 0.01 (0.00, 0.02)                  | 0.01 (0.00, 0.02)                                  |
|          |           | Continuous <sup>c</sup> | 0.25 (0.01, 0.49)**                       | 0.11 (-0.14, 0.37)                                       | 531 | 0.01 (0.00, 0.02)**                | 0.01 (0.00, 0.02)**                                |
|          | Ukraine   | Low                     | reference                                 | reference                                                | 164 | reference                          | reference                                          |
|          |           | Medium                  | 0.21 (-0.03, 0.46)                        | 0.28 (0.03, 0.52)*                                       | 164 | 0.00 (-0.01, 0.01)                 | 0.00 (-0.01, 0.01)                                 |
|          |           | High                    | -0.01 (-0.25, 0.24)                       | 0.07 (-0.18, 0.32)                                       | 163 | 0.00 (-0.01, 0.01)                 | 0.00 (-0.01, 0.01)                                 |
|          |           | Continuous <sup>c</sup> | 0.03 (-0.17, 0.23)                        | 0.02 (-0.19, 0.23)                                       | 491 | 0.00 (-0.01, 0.01)                 | 0.00 (-0.01, 0.01)                                 |
| PFOS     | Greenland | Low                     | reference                                 | reference                                                | 177 | reference                          | reference                                          |
|          |           | Medium                  | 0.00 (-0.25, 0.26)                        | -0.06 (-0.31, 0.19)                                      | 177 | 0.01 (0.00, 0.02)                  | 0.01 (0.00, 0.02)                                  |
|          |           | High                    | -0.11 (-0.37, 0.15)                       | -0.15 (-0.41, 0.10)                                      | 177 | 0.01 (-0.01, 0.02)                 | 0.00 (0.00, 0.02)                                  |
|          |           | Continuous <sup>c</sup> | -0.05 (-0.28, 0.19)                       | -0.07 (-0.31, 0.16)                                      | 531 | 0.00 (0.00, 0.01)                  | 0.00 (0.00, 0.02)                                  |
|          | Ukraine   | Low                     | reference                                 | reference                                                | 164 | reference                          | reference                                          |
|          |           | Medium                  | -0.01 (-0.25, 0.23)                       | -0.03 (-0.27, 0.22)                                      | 164 | 0.00 (-0.01, 0.01)                 | 0.00 (-0.01, 0.01)                                 |
|          |           | High                    | -0.01 (-0.25, 0.24)                       | 0.03 (-0.22, 0.28)                                       | 163 | 0.01 (0.00, 0.02)*                 | 0.01 (0.00, 0.02)                                  |
|          |           | Continuous <sup>c</sup> | 0.03 (-0.19, 0.25)                        | 0.04 (-0.19, 0.26)                                       | 491 | -0.01 (-0.02, 0.01)                | 0.00 (0.00, 0.01)                                  |

Abbreviations: CI, confidence interval; PFOA, perfluorooctanoate; PFOS, perfluorooctane sulfonate; WHtR, waist-to-height-ratio.

<sup>a</sup>Adjusted for maternal age at birth, maternal pre-pregnancy body mass index, smoking during pregnancy, maternal education and parity. <sup>b</sup>Adjusted for child sex, child age at follow-up, maternal age at birth, maternal pre-pregnancy body mass index, smoking during pregnancy, maternal education and parity. <sup>c</sup>Continuous PFOA and PFOS are natural logarithm transformed and  $\beta$  is the change in outcome for one natural log-unit of exposure.

\*Statistically significantly different compared to low exposed children,  $p < 0.05$ .

\*\*Statistically significantly different from 0 for one natural log-unit increase in exposure,  $p < 0.05$ .

Multiple imputation was used to impute missing data.

**Table S4.** Complete-case-analysis of maternal PFOA and PFOS concentrations during pregnancy and crude and adjusted relative risk (RR) of offspring overweight (WHO > 85<sup>th</sup> percentile (sex and age standardised)) and waist-height-ratio >0.5 at 5 to 9 years.

| Exposure                         | Level                   | Cases/n | Overweight<br>Crude RR<br>(95% CI) | Cases/n | Overweight<br>Adjusted <sup>b</sup> RR<br>(95% CI) | Cases/n | WHtR >0.5<br>Crude RR<br>(95% CI) | Cases/n | WHtR >0.5<br>Adjusted <sup>c</sup> RR<br>(95 % CI) |
|----------------------------------|-------------------------|---------|------------------------------------|---------|----------------------------------------------------|---------|-----------------------------------|---------|----------------------------------------------------|
| <b>PFOA</b>                      |                         |         |                                    |         |                                                    |         |                                   |         |                                                    |
| Greenland                        | Low                     | 38/143  | 1.00                               | 35/135  | 1.00                                               | 35/130  | 1.00                              | 43/117  | 1.00                                               |
|                                  | Medium                  | 57/136  | 1.57 (1.12, 2.19)                  | 55/127  | 1.40 (0.98, 2.01)                                  | 49/126  | 1.44 (1.01, 2.07)                 | 36/114  | 1.50 (1.02, 2.21)                                  |
|                                  | High                    | 57/147  | 1.47 (1.05, 2.06)                  | 53/133  | 1.27 (0.88, 1.84)                                  | 40/139  | 1.07 (0.73, 1.57)                 | 37/122  | 1.20 (0.80, 1.82)                                  |
|                                  | Continuous <sup>a</sup> | 152/426 | 1.35 (1.01, 1.79)                  | 143/395 | 1.13 (0.82, 1.57)                                  | 124/395 | 1.16 (0.85, 1.57)                 | 116/353 | 1.28 (0.90, 1.82)                                  |
| Ukraine                          | Low                     | 31/164  | 1.00                               | 30/155  | 1.00                                               | 11/164  | 1.00                              | 10/155  | 1.00                                               |
|                                  | Medium                  | 40/161  | 1.31 (0.87, 1.99)                  | 39/150  | 1.37 (0.89, 2.10)                                  | 13/164  | 1.18 (0.55, 2.56)                 | 12/150  | 1.41 (0.62, 3.21)                                  |
|                                  | High                    | 24/163  | 0.81 (0.50, 1.31)                  | 23/156  | 0.79 (0.48, 1.32)                                  | 11/162  | 1.01 (0.45, 2.27)                 | 10/155  | 1.13 (0.47, 2.72)                                  |
|                                  | Continuous <sup>a</sup> | 95/488  | 1.04 (0.75, 1.45)                  | 92/461  | 1.00 (0.70, 1.41)                                  | 35/490  | 1.36 (0.79, 2.32)                 | 32/460  | 1.43 (0.78, 2.63)                                  |
| Greenland & Ukraine <sup>d</sup> | Continuous <sup>a</sup> | 247/914 | 1.20 (0.97, 1.48)                  | 235/856 | 1.12 (0.90, 1.41)                                  | 159/885 | 1.21 (0.92, 1.58)                 | 148/813 | 1.29 (0.96, 1.75)                                  |
| <b>PFOS</b>                      |                         |         |                                    |         |                                                    |         |                                   |         |                                                    |
| Greenland                        | Low                     | 51/139  | 1.00                               | 48/132  | 1.00                                               | 32/122  | 1.00                              | 32/112  | 1.00                                               |
|                                  | Medium                  | 55/143  | 1.05 (0.78, 1.42)                  | 51/132  | 0.93 (0.69, 1.27)                                  | 42/130  | 1.23 (0.84, 1.82)                 | 38/116  | 1.18 (0.80, 1.74)                                  |
|                                  | High                    | 46/144  | 0.87 (0.63, 1.20)                  | 44/131  | 0.85 (0.61, 1.18)                                  | 50/143  | 1.33 (0.92, 1.94)                 | 46/125  | 1.31 (0.90, 1.92)                                  |
|                                  | Continuous <sup>a</sup> | 152/426 | 0.96 (0.73, 1.27)                  | 143/395 | 0.93 (0.79, 1.25)                                  | 124/395 | 1.35 (1.00, 1.83)                 | 116/353 | 1.47 (1.08, 2.00)                                  |
| Ukraine                          | Low                     | 35/164  | 1.00                               | 34/153  | 1.00                                               | 9/164   | 1.00                              | 8/153   | 1.00                                               |
|                                  | Medium                  | 31/163  | 0.89 (0.58, 1.37)                  | 31/157  | 0.89 (0.58, 1.37)                                  | 13/163  | 1.45 (0.64, 3.31)                 | 13/156  | 1.66 (0.71, 3.87)                                  |
|                                  | High                    | 29/161  | 0.87 (0.56, 1.35)                  | 27/151  | 0.86 (0.55, 1.34)                                  | 13/163  | 1.45 (0.64, 3.31)                 | 11/151  | 1.42 (0.58, 3.46)                                  |
|                                  | Continuous <sup>a</sup> | 95/488  | 1.08 (0.74, 1.58)                  | 92/461  | 1.09 (0.74, 1.59)                                  | 35/490  | 1.70 (0.87, 3.31)                 | 32/460  | 1.67 (0.80, 3.47)                                  |
| Greenland & Ukraine <sup>d</sup> | Continuous <sup>a</sup> | 247/914 | 1.01 (0.80, 1.26)                  | 235/856 | 1.00 (0.79, 1.26)                                  | 159/885 | 1.42 (1.08, 1.87)                 | 148/813 | 1.54 (1.16, 2.06)                                  |

Abbreviations: CI, confidence interval; PFOA, perfluorooctanoate; PFOS, perfluorooctane sulfonate; RR, relative risk; WHtR, waist-to-height-ratio.

<sup>a</sup>Continuous PFOA and PFOS are natural logarithm transformed. <sup>b</sup>Adjusted for maternal age at birth, maternal pre-pregnancy body mass index, smoking during pregnancy, maternal education and parity. <sup>c</sup>Adjusted for child sex, age at follow-up, maternal age at birth, maternal pre-pregnancy body mass index, smoking during pregnancy, maternal education and parity. <sup>d</sup>In addition adjusted for country.
